# Supplementary material
Source: PubMed Central journal article supplement (PMC3127903)
Supplement: 1106284108_pnas.201106284SI.pdf [file 1106284108_pnas.201106284SI.pdf]

# Supporting Information

Lee and Sancar 10.1073/pnas.1106284108

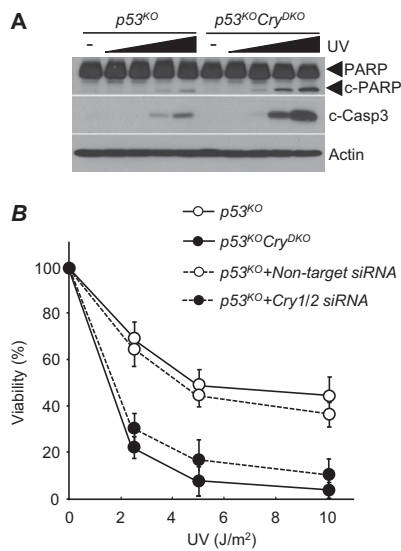

**Fig. S1.** *p53*-null and cryptochrome (*Cry*)-deficient cells are more sensitive to UV-induced apoptosis and clonogenic death than *p53<sup>KO</sup>* cells. (A) Apoptosis. Unirradiated (–) or irradiated (2, 5, 10, 20 Jm<sup>-2</sup>) cells of the indicated genotypes were harvested 24 h postirradiation, lysed, and analyzed by immunoblotting. c-Casp3, cleaved caspase 3; c-PARP, cleaved PARP. (B) Clonogenic survival. Cells of the indicated genotypes, transfected with the indicated siRNAs for 48 h, were irradiated with the indicated UV dose and then incubated for 9–10 d until colonies were readily visible. Colonies were stained with 5% methylene blue and then counted to obtain the UV survival curves. Results represent the means of three independent experiments (±SD).

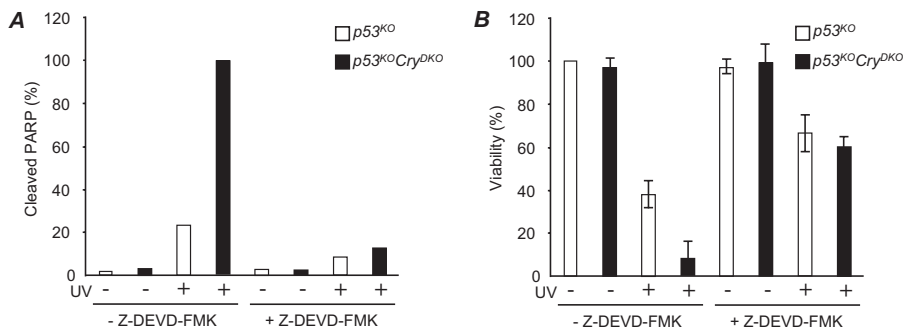

**Fig. S2.** *p73*-mediated UV killing of *p53*-null and *Cry*-null cells is due to increased apoptosis. Cells of the indicated genotypes were preincubated for 2 h with the caspase-3 inhibitor Z-Asp(OMe)-Glu(OMe)-Val-Asp(OMe)-CH<sub>2</sub>F (Z-DEVD-FMK) (R&D Systems) where indicated, irradiated with 10 Jm<sup>-2</sup>, and analyzed for apoptosis and UV survival. (A) Apoptosis. The maximum value of cleaved PARP was set to 100% and other values are plotted relative to the maximum. (B) UV survival. A standard clonogenic assay was used to obtain percent survival. Results represent the means (±SD) of three independent experiments.

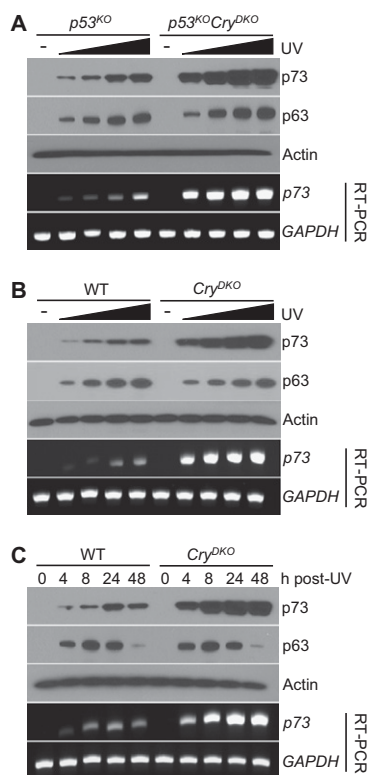

**Fig. 53.** p73 is highly induced in Cry-null cells by UV irradiation in a time- and dose-dependent manner. (A and B) Dose-response. Cells of the indicated genotypes were irradiated with 0, 2, 5, 10, or 20 Jm<sup>-2</sup> and harvested 24 h postirradiation, and p73 induction was probed by immunoblotting or RT-PCR, using actin and GAPDH as loading controls. (C) Time course. Cells were irradiated with 10 Jm<sup>-2</sup> and samples were analyzed at the indicated time points.

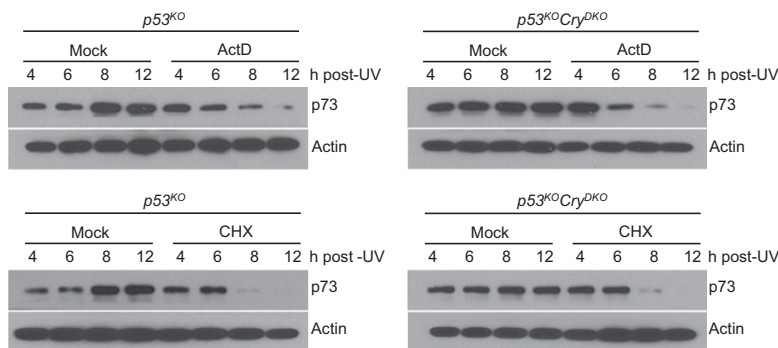

**Fig. 54.** Cryptochrome disruption does not affect posttranscriptional and posttranslational regulation of p73. Unirradiated or irradiated (10 Jm<sup>-2</sup>) cells of the indicated genotypes were incubated with either actinomycin D (ActD; 5 μg/mL) or cycloheximide (CHX; 20 μg/mL) 4 h after irradiation, and at the indicated times thereafter samples were analyzed for p73 by immunoblotting.

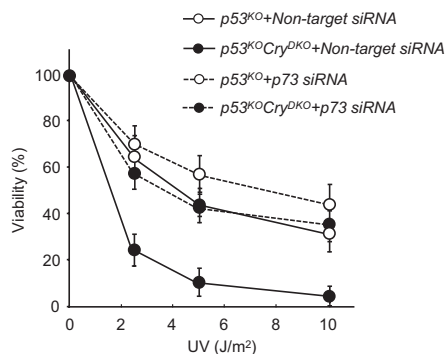

**Fig. 55.** Down-regulation of p73 in p53KO CryDKO cells increases their resistance to UV killing. Cells transfected with the indicated siRNAs were irradiated 48 h after transfection, and UV survival was determined by conventional methods. Means (±SD) of three independent experiments are plotted.

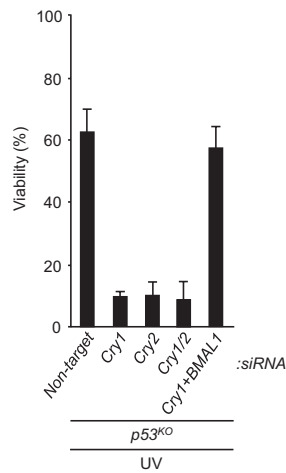

**Fig. S6.** Core clock proteins Cry and BMAL1 regulate sensitivity of p53-null cells to killing by UV irradiation. *p53<sup>KO</sup>* cells transfected with the indicated siRNAs were irradiated with  $10 \text{ J m}^{-2}$  and survival was determined by the conventional clonogenic assay ( $\pm$ SD,  $n = 3$ ).

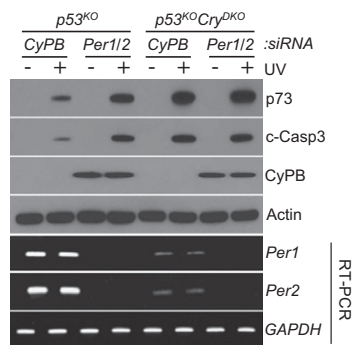

**Fig. S7.** Down-regulation of Period proteins (Per1 and 2) increases sensitivity of *p53<sup>KO</sup>* cells to UV-induced apoptosis. Cells transfected with the indicated siRNAs were irradiated with  $10 \text{ J m}^{-2}$  where indicated and 24 h later were harvested and analyzed by immunoblotting for protein expression and apoptosis and by RT-PCR for gene expression. Actin and *GAPDH* are internal controls for the immunoblots and RT-PCR reactions, respectively.

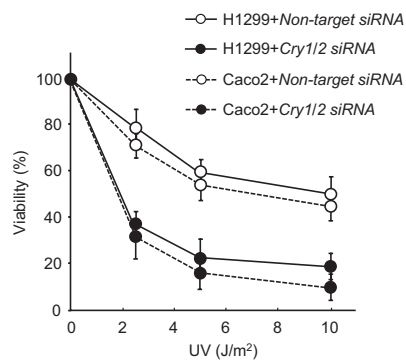

**Fig. S8.** Cryptochrome disruption increases the sensitivity of human p53-deficient tumor cells to killing by UV irradiation. The clonogenic survival of two human p53-null tumor cell lines without and with cryptochrome down-regulation are shown ( $\pm$ SD,  $n = 3$ ).

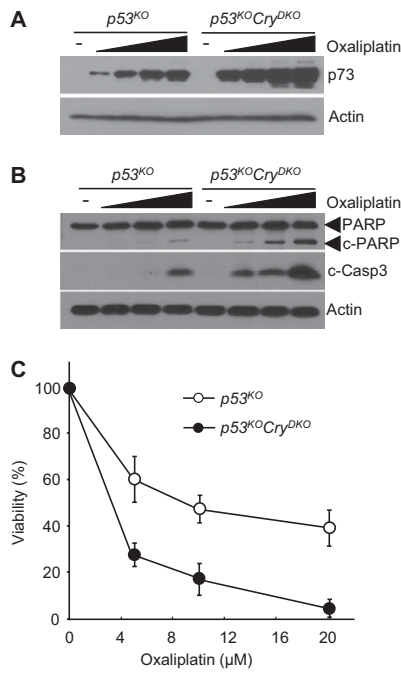

**Fig. 59.**  $p53^{KO}Cry^{DKO}$  cells are more sensitive to oxaliplatin-induced apoptosis and clonogenic killing than  $p53^{KO}$  cells. (A) Induction of p73 by oxaliplatin. Cells of the indicated genotypes were treated with 0, 2, 5, 10, or 20  $\mu$ M oxaliplatin and harvested 24 h later, and p73 induction was probed by immunoblotting. (B) Cells were treated with 0, 5, 10, or 20  $\mu$ M oxaliplatin, harvested 24 h later, and analyzed for apoptosis by immunoblotting for PARP and caspase 3. (C) Clonogenic survival of oxaliplatin-treated cells ( $\pm$ SD,  $n = 3$ ).

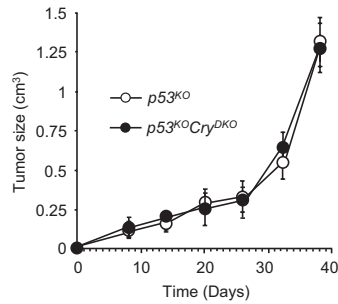

**Fig. 510.** Growth rates of  $p53^{KO}$  and  $p53^{KO}Cry^{DKO}$  xenografts in NOD/SCID mice. Tumor xenografts were established by subcutaneous injection of  $2 \times 10^6$  cells of a  $p53^{KO}$  genotype in the left flank and a  $p53^{KO}Cry^{DKO}$  genotype in the right flank of a 6-wk-old female mouse. Tumor growth was monitored by a caliper and the size is plotted as a function of time after inoculation. The values are means  $\pm$  SD ( $n = 10$ ).

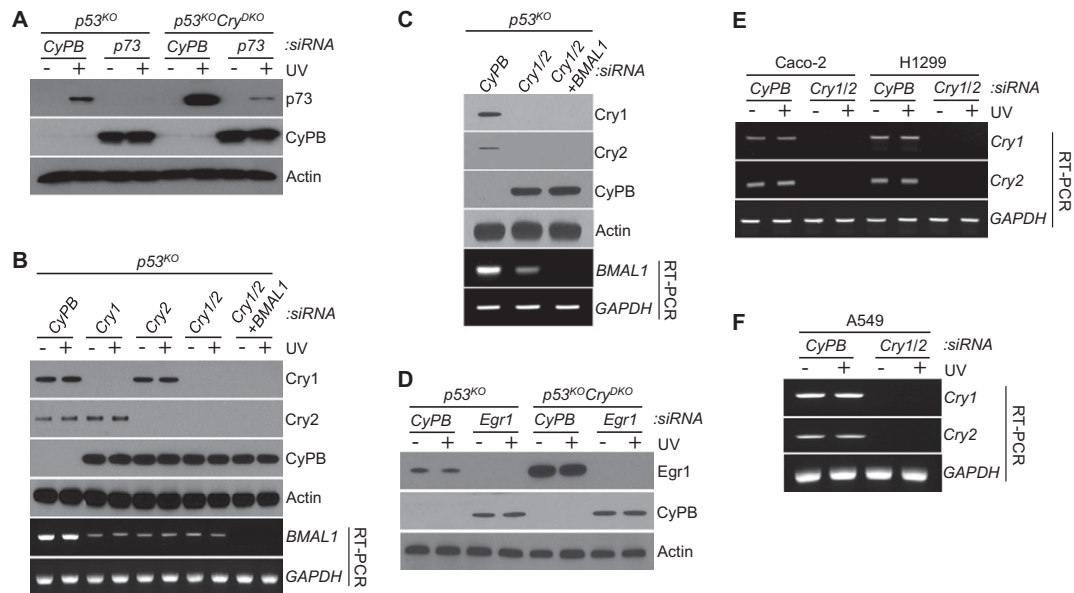

**Fig. S11.** Specificity and efficiency of siRNAs used to down-regulate apoptosis and clock genes. (A–D) Mouse cell lines. (E and F) Human cell lines. When available, antibodies were used to monitor down-regulation; otherwise, RT-PCR was used for the mRNAs of target genes.

**Table S1. Primer sequences for chromatin immunoprecipitation**

| Gene        |   | Sequence (5' to 3')  | Protein        |
|-------------|---|----------------------|----------------|
| <i>Egr1</i> | F | CTCCCTCACTGCGTCTAAGG | BMAL1          |
|             | R | CACCCAGAATCGAAAGGCTA |                |
| <i>p73</i>  | F | GGACTTTGAAGAGTCCAACC | Egr1           |
|             | R | CGCTGCCCTTACTGTCCTAA |                |
| <i>p73</i>  | F | CCACTGCCTTTGGAGCTAAG | C-EBP $\alpha$ |
|             | R | GCGAGCTGCAGATTAGAGAC |                |

F, forward; R, reverse.

**Table S2. Primer sequences**

| Name         |   | Sequence (5' to 3')   | Species |
|--------------|---|-----------------------|---------|
| <i>p73</i>   | F | ACCTTCGACACCATGTCTCC  | Mouse   |
|              | R | GCGAGGTTGTTGCCCTTCTAC |         |
| <i>BMAL1</i> | F | CGAAGACAATGAGCCAGACA  | Mouse   |
|              | R | AAATAGCTGTCGCCCTCTGA  |         |
| <i>Per1</i>  | F | CTGGCTCCTCCAGTGATAGC  | Mouse   |
|              | R | CGCTTGGTTGTAAGTGGGAAT |         |
| <i>Per2</i>  | F | AGGATGTGGCAGGTAACAGG  | Mouse   |
|              | R | TGTACAGTGTGGGGTGCTA   |         |
| <i>GAPDH</i> | F | GGTGAAGTCGGTGTGAACG   | Mouse   |
|              | R | CTCGCTCCTGGAAGATGGTG  |         |
| <i>Cry1</i>  | F | GGCGTTATTTGCCTGTCCTA  | Human   |
|              | R | ACGTTTCCCACTGAGAC     |         |
| <i>Cry2</i>  | F | GTCCTGCAGTGCTTTCTTCC  | Human   |
|              | R | CCACACAGGAAGGGACAGAT  |         |
| <i>GAPDH</i> | F | ACAGTCAGCCGATCTTCTT   | Human   |
|              | R | TTGATTTTGGAGGGATCTCG  |         |
